# Supplementary material for: Prognostic and biological function value of OSBPL3 in colorectal cancer analyzed by multi-omic data analysis
Source: Springer Nature journal article supplement (doi:10.1186/s12876-023-02824-1), 2023-08-07

A

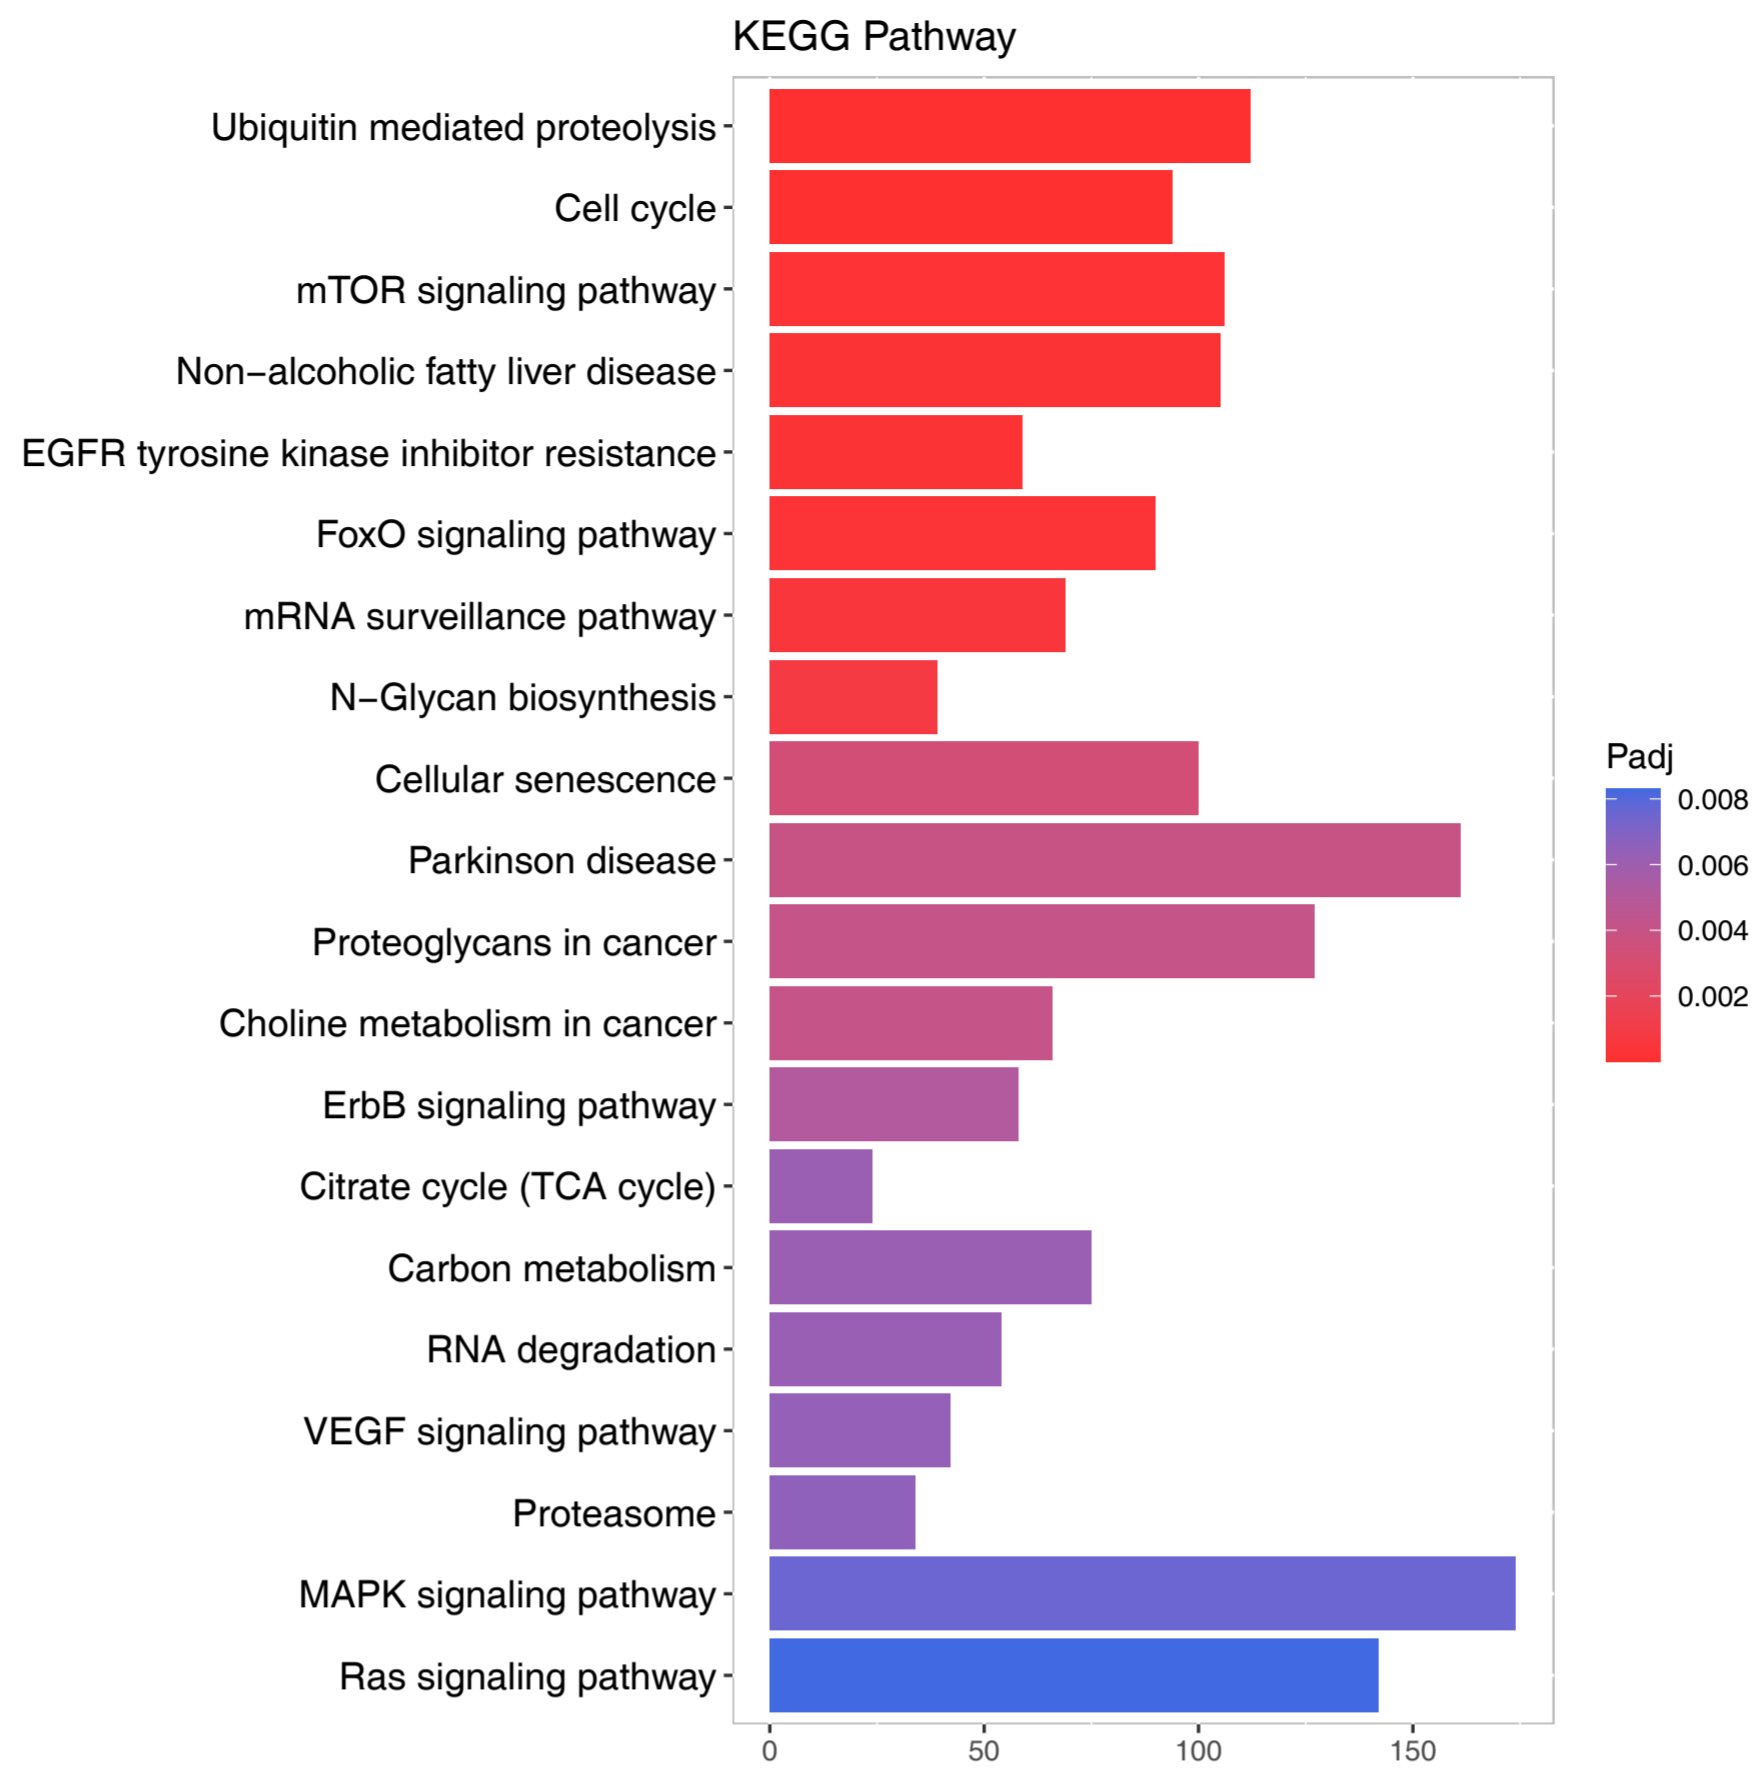

B

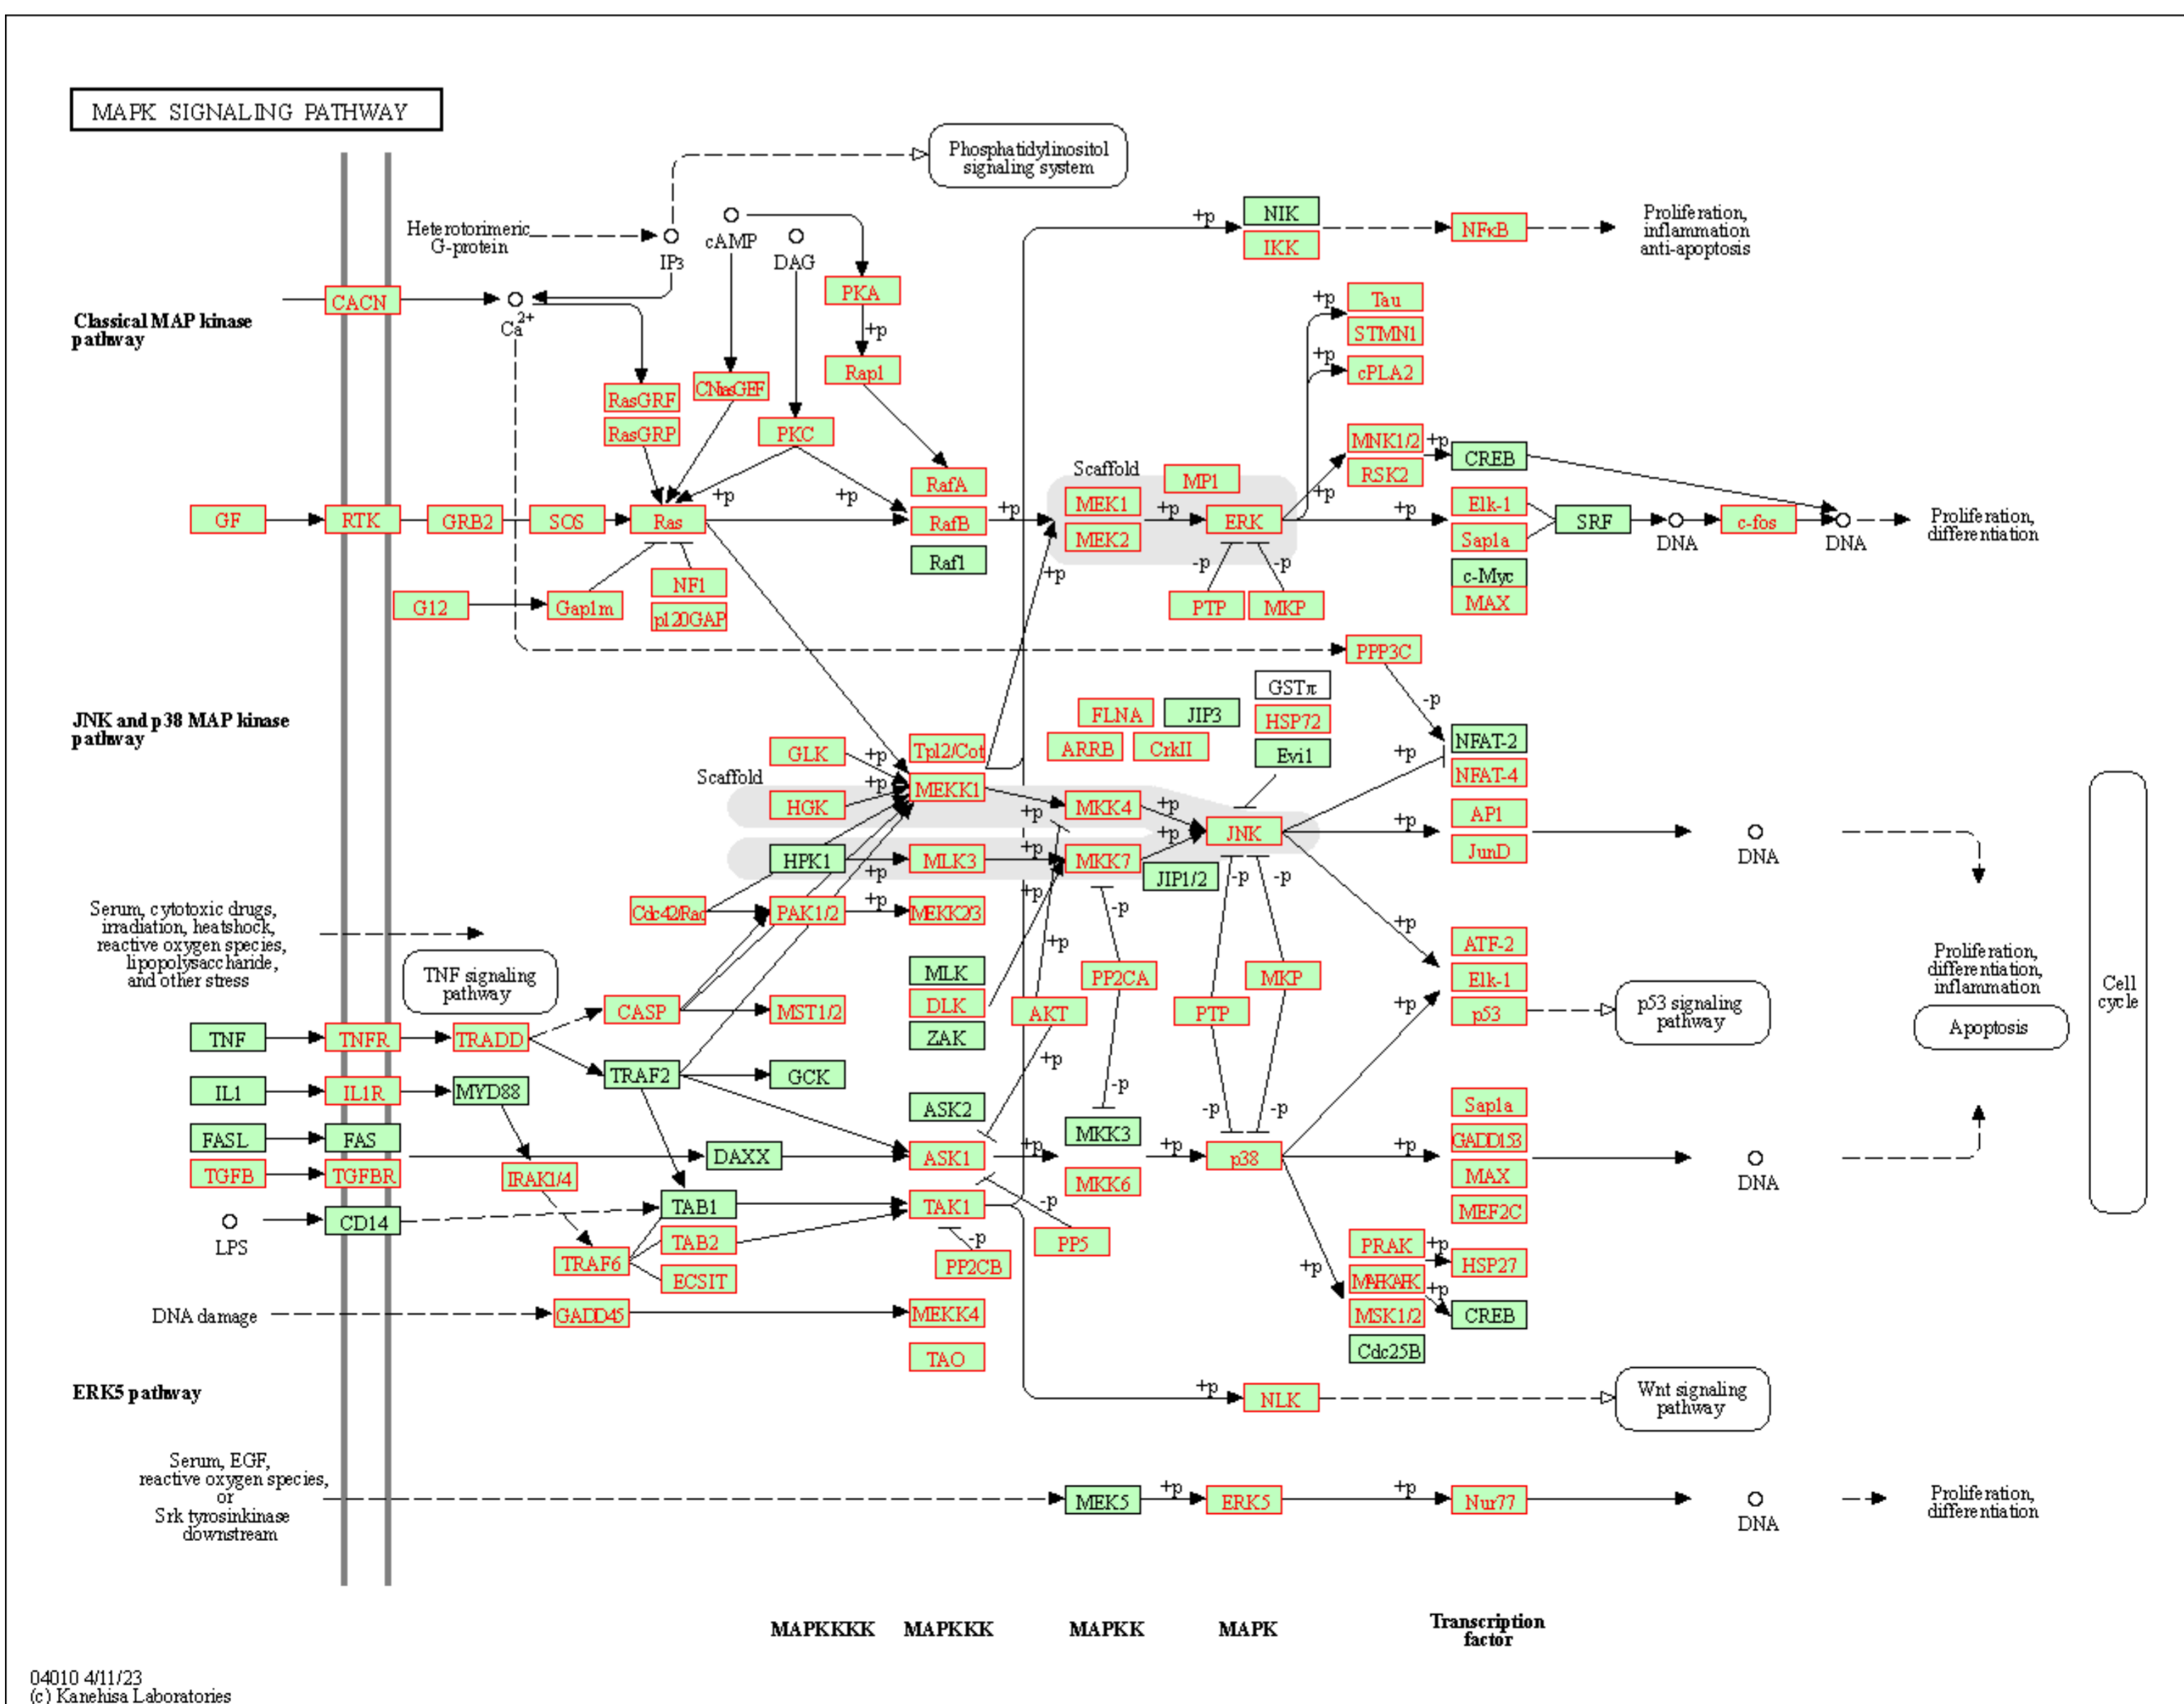

Supplement: MOESM3 [file 25895658]
